# Supplementary material
Source: publisher figshare collection journal article supplement (https://sage.figshare.com/ndownloader/files/36009555)
Supplement: Supplementary file 1 [file 36009555]

Coronal Section Legends

L1

| EPl | External plexiform layer of the olfactory bulb |
| --- | --- |
| Gl | Glomerular layer of the olfactory bulb |
| Gr | Gyrus rectus |
| GrO | Granule cell layer of the olfactory bulb |
| Ml | Mitral cell layer of the olfactory bulb |
| ONl | Olfactory nerve layer |
| pFrCx | Prefrontal cortex |
| Rhf | Rhinal fissure |

L2

| EPl | External plexiform layer of the olfactory bulb |
| --- | --- |
| Gl | Glomerular layer of the olfactory bulb |
| Gr | Gyrus rectus |
| GrO | Granule cell layer of the olfactory bulb |
| Ml | Mitral cell layer of the olfactory bulb |
| ONl | Olfactory nerve layer |
| pFrCx | Prefrontal cortex |
| So | Sulcus olfactorius |

L3

| AO | Anterior (rostral) olfactory nucleus |
| --- | --- |
| EPl | External plexiform layer of the olfactory bulb |
| Gl | Glomerular layer of the olfactory bulb |
| Gr | Gyrus rectus |
| GrO | Granule cell layer of the olfactory bulb |
| Ol | Olfactory tract |
| ONl | Olfactory nerve layer |
| PG | Proreus gyrus |
| pFrCx | Prefrontal cortex |
| Rhf | Rhinal fissure |
| So | Sulcus olfactorius |

L4

| FrCx | Frontal cortex |
| --- | --- |
| Gr | Gyrus rectus |
| OB | Olfactory bulb |
| ON | Oculomotor nucleus |
| PG | Proreus gyrus |
| Ps | Presylvian sulcus |
| PyCx | Pyriform (piriform) cortex |
| Rhf | Rhinal fissure |
| SOi | Intermediate stria olfactoria |
| SOl | Lateral stria olfactoria |
| SSG | Suprasylvian gyrus |

L5

| Cl | Claustrum |
| --- | --- |
| FrCx(m) | Frontal cortex (primary motor) |
| FrCx (sm) | Frontal cortex (sensory motor) |
| ON | Oculomotor nucleus |
| PyCx | Pyriform (piriform) cortex |
| Ps | Presylvian sulcus |
| TeCx | Temporal cortex |

L6

| Cl | Claustrum |
| --- | --- |
| Cs | Coronal sulcus |
| CS | Cruciate sulcus |
| FrCx(m) | Frontal cortex (primary motor) |
| FrCx (sm) | Frontal cortex (sensory motor) |
| LPy | Pyriform lobe |
| LV | Lateral ventricle |
| Ps | Presylvian sulcus |
| PyCx | Pyriform (piriform) cortex |
| Rhf | Rhinal fissure |
| SOl | Lateral stria olfactoria |
| TeCx | Temporal cortex |

L7

| cc | Corpus callosum |
| --- | --- |
| Cd | Caudate nucleus |
| CiCx | Cingulate cortex |
| Cl | Claustrum |
| cr | Corona radiata |
| FrCx(m) | Frontal cortex (primary motor) |
| ic | Internal capsule |
| LV | Lateral ventricle |
| Ol | Olfactory tract |
| PSG | Posterior (dorsal) sigmoid gyrus |
| PyCx | Pyriform (piriform) cortex |
| SG | Sylvian gyrus |
| Tu | Olfactory tubercle |

L8

| cc | Corpus callosum |
| --- | --- |
| Cd | Caudate nucleus |
| Ci | Cingulum |
| CiCx | Cingulate cortex |
| CS | Cruciate sulcus |
| ic | Internal capsule |
| LV | Lateral ventricle |
| Ol | Olfactory tract |
| PSG | Posterior (dorsal) sigmoid gyrus |
| Pu | Putamen |
| PyCx | Pyriform (piriform) cortex |
| SeN | Septal nuclei |
| Tu | Olfactory tubercle |

L9

| 2n | Optic nerve (cranial nerve II) |
| --- | --- |
| aca | Anterior commissure (rostral commissure), anterior (rostral) part |
| cc | Corpus callosum |
| Cd | Caudate nucleus |
| Ci | Cingulum |
| CiCx | Cingulate cortex |
| cr | Corona radiata |
| CS | Cruciate sulcus |
| GPa | Globus pallidus |
| ic | Internal capsule |
| LV | Lateral ventricle |
| Ol | Olfactory tract |
| Pu | Putamen |
| PyCx | Pyriform (piriform) cortex |
| SeN | Septal nuclei |
| SG | Sylvian gyrus |

L10

| 3V | Third ventricle |
| --- | --- |
| cc | Corpus callosum |
| Cd | Caudate nucleus |
| Ci | Cingulum |
| CiCx | Cingulate cortex |
| CS | Cruciate sulcus |
| ec | External capsule |
| f | Fornix |
| GPa | Globus pallidus |
| ic | Internal capsule |
| LV | Lateral ventricle |
| opt | Optic tract |
| Pu | Putamen |
| PyCx | Pyriform (piriform) cortex |
| ThN | Talamic nuclei |

L11

| Amg | Amygdala |
| --- | --- |
| cc | Corpus callosum |
| Cd | Caudate nucleus |
| Ci | Cingulum |
| CiCx | Cingulate cortex |
| Cl | Claustrum |
| CS | Cruciate sulcus |
| ec | External capsule |
| f | Fornix |
| GPa | Globus pallidus |
| LV | Lateral ventricle |
| opt | Optic tract |
| Pu | Putamen |
| PyCx | Pyriform (piriform) cortex |
| SG | Sylvian gyrus |
| ThN | Talamic nuclei |

L12

| Amg | Amygdala |
| --- | --- |
| HipC | Hippocampus |
| cc | Corpus callosum |
| Cd | Caudate nucleus |
| Ci | Cingulum |
| CiCx | Cingulate cortex |
| CS | Cruciate sulcus |
| ec | External capsule |
| EnCx | Entorhinal cortex |
| f | Fornix |
| fi | Fimbria |
| LV | Lateral ventricle |
| SG | Sylvian gyrus |
| Teg | Tegmental area |
| ThN | Talamic nuclei |

L13

| 3n | Oculomotor nerve (cranial nerve III) |
| --- | --- |
| HipC | Hippocampus |
| cc | Corpus callosum |
| Ci | Cingulum |
| CiCx | Cingulate cortex |
| cp | Cerebral peduncle |
| ec | External capsule |
| EnCx | Entorhinal cortex |
| f | Fornix |
| fi | Fimbria |
| HaN | Habenular nucleus |
| LV | Lateral ventricle |
| SN | Substantia nigra |
| SpS | Splenialis sulcus |
| Teg | Tegmental area |
| ThN | Talamic nuclei |

L14

| 3n | Oculomotor nerve (cranial nerve III) |
| --- | --- |
| HipC | Hippocampus |
| cc | Corpus callosum |
| Ci | Cingulum |
| CiCx | Cingulate cortex |
| cp | Cerebral peduncle |
| EnCx | Entorhinal cortex |
| f | Fornix |
| fi | Fimbria |
| HaN | Habenular nucleus |
| LV | Lateral ventricle |
| MGe | Medial geniculate nucleus |
| SN | Substantia nigra |
| SpS | Splenialis sulcus |
| ThN | Talamic nuclei |

L15

| HipC | Hippocampus |
| --- | --- |
| Ci | Cingulum |
| CiCx | Cingulate cortex |
| cp | Cerebral peduncle |
| EnCx | Entorhinal cortex |
| IC | Inferior (caudal) colliculus |
| LV | Lateral ventricle |
| MGe | Medial geniculate nucleus |
| SC | Superior (rostral) colliculus |
| SpS | Splenialis sulcus |

L16

| HipC | Hippocampus |
| --- | --- |
| IC | Inferior (caudal) colliculus |
| Pn | Pons (pontine nuclei) |
| RsCx | Retrosplenial cortex |
| SC | Superior (rostral) colliculus |
| SpS | Splenialis sulcus |

L17

| 4V | Fourth ventricle |
| --- | --- |
| 5n | Trigeminal nerve (cranial nerve V) |
| DRaN | Dorsal raphe nucleus |
| IC | Inferior (caudal) colliculus |
| ll | Lateral lemniscus |
| mcbp | Medial cerebellar peduncle |
| OcCx | Occipital cortex |
| OcCx (Vis) | Primary visual cortex |
| PnN | Pontine nuclei |
| py | Pyramidal tract |
| scbp | Superior (rostral) cerebellar peduncle |

L18

| 11n | Accessory nerve |
| --- | --- |
| 4V | Fourth ventricle |
| 7n | Facial nerve (cranial nerve VII) |
| CoN | Cochlear nucleus |
| mcbp | Medial cerebellar peduncle |
| OcCx | Occipital cortex |
| OcCx (Vis) | Primary visual cortex |
| PFl | Paraflocculus |
| py | Pyramidal tract |
| RtN | Reticular nucleus |
| scbp | Superior (rostral) cerebellar peduncle |
| SON | Superior (rostral) olivary nucleus |
| TB | Trapezoid body |
| Vrms | Vermis |

L19

| 4V | Fourth ventricle |
| --- | --- |
| 5-st | Spinal tract of trigeminal nerve |
| 7N | Facial nucleus |
| CoN | Cochlear nucleus |
| DN | Dentate nucleus |
| FL | Flocculus |
| FN | Fastigial nucleus |
| INcb | Interposed nucleus of the cerebellum |
| OcCx | Occipital cortex |
| OcCx (Vis) | Primary visual cortex |
| py | Pyramidal tract |
| RtN | Reticular nucleus |
| SON | Superior (rostral) olivary nucleus |
| VeN | Vestibular nuclei |
| Vrms | Vermis |

L20

| OcCx | Occipital cortex |
| --- | --- |
| OcCx (Vis) | Primary visual cortex |

L21

| 12N | Hypoglossus nucleus |
| --- | --- |
| 4V | Fourth ventricle |
| 5-stN | Nucleus of the spinal tract of trigeminal nerve |
| AmbN | Ambiguous nucleus |
| CuN | Cuneate nucleus |
| GN | Gracile nucleus |
| ION | Inferior  (caudal) olivary nucleus |
| ml | Medial lemniscus |
| py | Pyramidal tract |
| RtN | Reticular nucleus |
| SotN | Nucleus of the solitary tract |
| Vrms | Vermis |

L22

| 12N | Hypoglossus nucleus |
| --- | --- |
| 5-st | Spinal tract of trigeminal nerve |
| 5-stN | Nucleus of the spinal tract of trigeminal nerve |
| Cuf | Cuneate fascicle |
| CuN | Cuneate nucleus |
| GN | Gracile nucleus |
| ION | Inferior  (caudal) olivary nucleus |
| ml | Medial lemniscus |
| py | Pyramidal tract |
| RtN | Reticular nucleus |
| Vrms | Vermis |
